# Supplementary material
Source: PubMed Central journal article supplement (PMC2932613)
Supplement: 1009652107_pnas.201009652SI.pdf [file 1009652107_pnas.201009652SI.pdf]

# Supporting Information

Sun et al. 10.1073/pnas.1009652107

| Mutant designation | Mutated residues                                                                                                                         | Description                                                       |
|--------------------|------------------------------------------------------------------------------------------------------------------------------------------|-------------------------------------------------------------------|
| G376R              | <div><div>376</div><div><u>G</u>GA → <u>A</u>GA</div><div>G R</div></div>                                                                | Mutation of amino acid 376                                        |
| K376E              | <div><div>379</div><div><u>A</u>AA → <u>G</u>AA</div><div>K E</div></div>                                                                | Mutation of amino acid 379                                        |
| E439del            | <div><div>439</div><div><u>G</u>AA <u>G</u>AT</div><div>E D</div></div>                                                                  | Deletion of amino acid 439                                        |
| KS459delIN         | <div><div>459</div><div><u>A</u>AA <u>A</u>GT</div><div>K S</div></div>                                                                  | Deletion of amino acid 459, mutation of amino acid 460 to N       |
| D560Y              | <div><div>560</div><div><u>G</u>AC → <u>T</u>AC</div><div>D Y</div></div>                                                                | Mutation of amino acid 560                                        |
| DKRMNS560del       | <div><div>559</div><div><u>ATT</u> <u>G</u>AC <u>A</u>AA <u>C</u>GT <u>A</u>TG <u>A</u>AC <u>A</u>GC</div><div>I D K R M N S</div></div> | Deletion of amino acids 560-565                                   |
| N564K              | <div><div>564</div><div><u>A</u>AC → <u>A</u>AG</div><div>N K</div></div>                                                                | Mutation of amino acid 564                                        |
| R574fs             | <div><div>574</div><div><u>A</u>GA AAG</div><div>R K</div></div>                                                                         | Frame shift at position 574, premature stop codon at position 600 |
| T576 del           | <div><div>576</div><div><u>A</u>CG <u>A</u>GA</div><div>T R</div></div>                                                                  | Deletion of amino acid 576                                        |
| W583 del           | <div><div>583</div><div><u>T</u>GG <u>T</u>TG</div><div>W L</div></div>                                                                  | Deletion of amino acid 583                                        |

Underlined nucleotides are deleted in the mutants.

Fig. S1. List of the mutants and their effects on the amino acid sequence of p85.

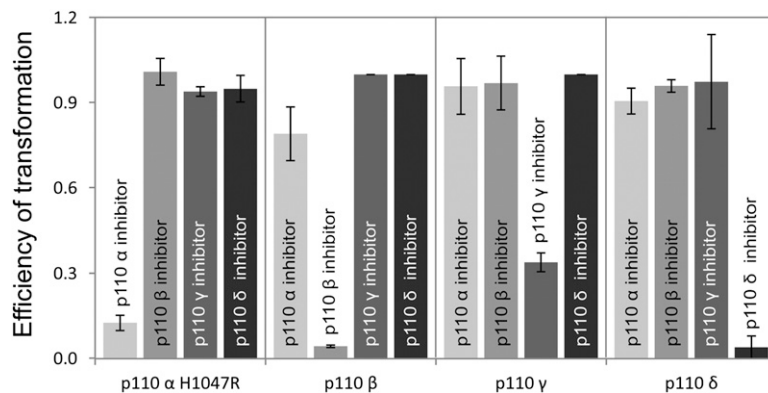

**Fig. S2.** Controls documenting the p110 isoform specificity of the inhibitors used in Figs. 6 and 7. The following inhibitors were used in this experiment: p110 $\alpha$  inhibitor A66 (700 nM), p110 $\beta$  inhibitor TGX-221 (250 nM), p110 $\gamma$  inhibitor AS-604850 (5  $\mu$ M), and p110 $\delta$  inhibitor IC87114 (5  $\mu$ M). Chicken embryo fibroblasts were transfected with RCAS vector constructs expressing p110 $\alpha$  H1047R, p110 $\beta$ , p110 $\gamma$ , or p110 $\delta$ . The cultures were overlaid with nutrient agar either containing or not containing inhibitor. Overlays were replenished every second day, and foci of transformed cells were counted on posttransfection day 10. The plot shows relative efficiencies of transformation (ratio of focus count in the presence of inhibitor to the focus count in the absence of inhibitor).

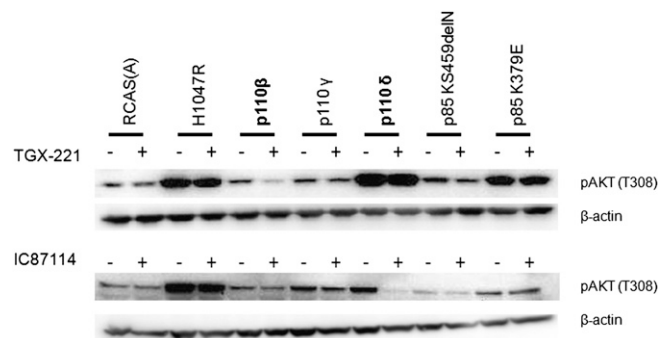

**Fig. S3.** Inhibitors specific for p110 $\beta$  and p110 $\delta$  do not affect signaling that is induced by the p85 mutants.

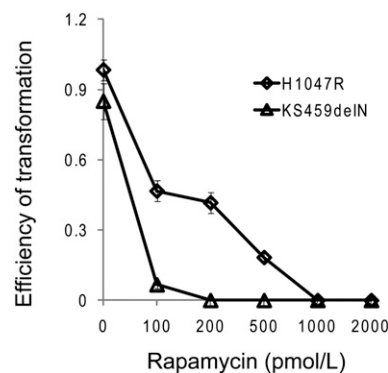

**Fig. S4.** Dose-response of oncogenic transformation induced by the p110 $\alpha$  mutant H1047R or the p85 mutant KS459delN to rapamycin. Focus formation by the p85 mutant is significantly more sensitive to rapamycin than focus formation induced by the p110 $\alpha$  mutant.
